# Supplementary material
Source: MDPI journal article supplement (https://www.mdpi.com/2073-4395/12/7/1560)
Supplement: s1 [file s1]

## Supplementary Materials

In accordance with Lu (1999) [69], soil texture was measured using pipette analysis, and soil moisture content was measured by drying 10 g soil at 105 °C for 24 h to a constant weight. Soil bulk density (BD) was measured by collecting undisturbed soil cores using a 100 cm<sup>3</sup> cutting ring from a depth of 0-20 cm after harvest. Soil pH and electric conductivity (EC) were measured in a 1:5 ratio of soil to deionized water with a pH meter (PHS-3C, Shanghai) and a Mettler Toledo instrument (FE30-K, Shanghai, China). The SOC content was determined by wet digestion with potassium dichromate, and total N was analyzed by the Kjeldahl method. The soil total P contents were determined by the molybdenum antimony colorimetric method after digestion with an H<sub>2</sub>SO<sub>4</sub> + HClO<sub>4</sub> solution. Soil cation exchange capacity (CEC) was measured using hexamminecobalt trichloride and was expressed in cmol kg<sup>-1</sup>. Soil dissolved organic C (DOC) and N (DON) contents were determined using a multi N/C 3100 analyzer (Jena TOC Analyzer, Germany). Briefly, DOC and DON were extracted by adding 25 mL H<sub>2</sub>O to 5 g moist soil, shaking for 1 h followed by centrifuging at 4000 rpm for 20 min, and then the supernatant was filtered through a 0.45 µm membrane. Soil microbial biomass C (MBC) and N (MBN) were determined by using the chloroform fumigation extraction method (Shen, et al., 2021) [70]. Briefly, MBC and MBN were extracted with 0.50 M K<sub>2</sub>SO<sub>4</sub> for 30 min (10 g soil with 50 mL solution) and subsequently measured on a multi N/C 3100 analyzer (Jena TOC Analyzer, Germany). The conversion coefficients of MBC and MBN are 0.45 and 0.54, respectively. The soil NH<sub>4</sub><sup>+</sup>-N and NO<sub>3</sub><sup>-</sup>-N contents were measured on an ultraviolet spectrophotometer (HITACHI, UV-2900, Tokyo, Japan) using indophenol blue and two-wavelength ultraviolet spectrometry, respectively, following extraction by shaking for 1 h on a rotary shaker with 2 M KCl (soil: KCl = 1:5) solution. Available P was extracted with 0.5 M NaHCO<sub>3</sub> and quantified by the molybdenum blue method using an ultraviolet spectrophotometer. Available K was determined using the flame photometry method.

Table S1 Initial properties of the soil in our study (mean ± SD, n = 3).

| pH                           | BD (g cm <sup>-3</sup> )  | Clay (%)                 | Silt (%)                                               | Sand (%)                                               |
|------------------------------|---------------------------|--------------------------|--------------------------------------------------------|--------------------------------------------------------|
| 7.95 ± 0.48                  | 1.30 ± 0.35               | 30.5 ± 3.36              | 66.4 ± 7.30                                            | 3.10 ± 0.34                                            |
| CEC (cmol kg <sup>-1</sup> ) | SOC (g kg <sup>-1</sup> ) | TN (g kg <sup>-1</sup> ) | NO <sub>3</sub> <sup>-</sup> -N (mg kg <sup>-1</sup> ) | NH <sub>4</sub> <sup>+</sup> -N (mg kg <sup>-1</sup> ) |
| 25.3 ± 2.08                  | 18.8 ± 2.27               | 2.30 ± 0.36              | 36.0 ± 14.4                                            | 51.2 ± 12.2                                            |

Note: BD: bulk density; Sand is 0.02-2 mm, silt is 0.002-0.02 mm and clay < 0.002 mm. CEC: cation exchange capacity; SOC: soil organic carbon; TN: total N.

Table S2 Main compounds and ingredient content of the chemical fertilizers applied.

| Fertilizers                 | Main compounds                                  | Main ingredient content             |
|-----------------------------|-------------------------------------------------|-------------------------------------|
| Urea                        | (NH <sub>2</sub> ) <sub>2</sub> CO              | 46.0% N                             |
| Calcium magnesium phosphate | Ca <sub>3</sub> (PO <sub>4</sub> ) <sub>2</sub> | 14.0% P <sub>2</sub> O <sub>5</sub> |
|                             | CaSiO <sub>3</sub>                              | 45.0% CaO                           |
|                             | MgSiO <sub>3</sub>                              | 20.0% SiO <sub>2</sub>              |
|                             |                                                 | 12.0% MgO                           |
| Potassium chloride          | KCl                                             | 63.2% K <sub>2</sub> O              |

Table S3 Results of two-way ANOVA and repeated-measures ANOVA (F-values and significance) for cumulative N<sub>2</sub>O and NO emissions. \*\*\* Significant at  $p < 0.001$ ; \*\* Significant at  $p < 0.01$ ; \* Significant at  $p < 0.05$ .

| Parameter        | Year      | N ×      |          |          | Biochar × |          |         |                    |
|------------------|-----------|----------|----------|----------|-----------|----------|---------|--------------------|
|                  |           | N        | Biochar  | Year     | Biochar   | N × Year | Year    | N × Biochar × Year |
| N <sub>2</sub> O | 2018-2020 | 1373***  | 21.44*** | 44.36*** | 9.096**   | 50.96*** | 4.518** | 5.130**            |
|                  | 2018      | 2474***  | 97.42*** |          | 63.26***  |          |         |                    |
|                  | 2019      | 223.7*** | 8.825**  |          | 4.170*    |          |         |                    |
|                  | 2020      | 660.2*** | 0.530    |          | 0.293     |          |         |                    |
| NO               | 2018-2020 | 946.9*** | 11.42**  | 40.82*** | 8.737**   | 30.73*** | 0.165   | 0.226              |
|                  | 2018      | 623.2*** | 5.694*   |          | 4.562*    |          |         |                    |
|                  | 2019      | 872.3*** | 16.09*** |          | 12.65**   |          |         |                    |
|                  | 2020      | 246.7*** | 2.842    |          | 2.036     |          |         |                    |

Table S4 Results of two-way ANOVA and repeated-measures ANOVA (F-values and significance) for vegetable yield and quality and soil fertility index (SFI). \*\*\* Significant at  $p < 0.001$ ; \*\* Significant at  $p < 0.01$ ; \* Significant at  $p < 0.05$ .

| Parameter       | Year      | N        | Biochar | Year     | N × Biochar | N × Year | Biochar × Year | N × Biochar × Year |
|-----------------|-----------|----------|---------|----------|-------------|----------|----------------|--------------------|
| Yield           | 2018-2020 | 262.6*** | 4.056*  | 0.922    | 0.316       | 7.891**  | 0.538          | 0.819              |
|                 | 2018      | 127.1*** | 2.626   |          | 0.534       |          |                |                    |
|                 | 2019      | 66.46*** | 2.261   |          | 0.127       |          |                |                    |
|                 | 2020      | 127.8*** | 0.664   |          | 1.211       |          |                |                    |
| Nitrate         | 2018-2020 | 94.60*** | 2.081   | 3.245    | 1.870       | 0.975    | 1.066          | 0.175              |
|                 | 2018      | 49.21*** | 0.522   |          | 1.599       |          |                |                    |
|                 | 2019      | 33.36*** | 0.909   |          | 1.327       |          |                |                    |
|                 | 2020      | 36.15*** | 2.243   |          | 0.192       |          |                |                    |
| Vitamin C       | 2018-2020 | 17.03**  | 0.329   | 3.897*   | 0.963       | 0.068    | 0.148          | 0.146              |
|                 | 2018      | 7.113*   | 0.477   |          | 1.154       |          |                |                    |
|                 | 2019      | 8.000*   | 0.432   |          | 0.150       |          |                |                    |
|                 | 2020      | 1.580    | 0.005   |          | 0.071       |          |                |                    |
| Soluble sugar   | 2018-2020 | 1.001    | 0.241   | 1.083    | 0.082       | 5.935**  | 0.316          | 0.262              |
|                 | 2018      | 6.930*   | 0.202   |          | 0.084       |          |                |                    |
|                 | 2019      | 2.597    | 0.171   |          | 0.080       |          |                |                    |
|                 | 2020      | 5.945*   | 0.731   |          | 0.689       |          |                |                    |
| Soluble protein | 2018-2020 | 16.25**  | 0.388   | 2.365    | 0.244       | 0.355    | 0.136          | 0.012              |
|                 | 2018      | 13.87**  | 0.285   |          | 0.322       |          |                |                    |
|                 | 2019      | 3.388    | 0.173   |          | 0.093       |          |                |                    |
|                 | 2020      | 5.513*   | 0.239   |          | 0.041       |          |                |                    |
| SFI             | 2018-2020 | 177.8*** | 3.782   | 34.53*** | 21.83***    | 26.77*** | 0.828          | 0.508              |
|                 | 2018      | 170.6*** | 0.113   |          | 10.51**     |          |                |                    |
|                 | 2019      | 46.30*** | 1.801   |          | 5.723*      |          |                |                    |
|                 | 2020      | 9.359**  | 4.232*  |          | 7.620**     |          |                |                    |

Table S5 Soil physicochemical properties after vegetable harvest in 2018, 2019 and 2020 (mean  $\pm$  SD, n = 3).

| Parameter                                                 | Year | N0C0               | N0C1                | N0C2               | N1C0                | N1C1               | N1C2               |
|-----------------------------------------------------------|------|--------------------|---------------------|--------------------|---------------------|--------------------|--------------------|
| CEC<br>(cmol kg <sup>-1</sup> )                           | 2018 | 24.2 $\pm$ 0.14Ac  | 20.2 $\pm$ 0.52Cb   | 21.9 $\pm$ 0.81BCb | 23.2 $\pm$ 0.38ABb  | 20.6 $\pm$ 0.54Cb  | 21.7 $\pm$ 1.24BCb |
|                                                           | 2019 | 26.3 $\pm$ 0.60Ab  | 22.6 $\pm$ 1.69Bab  | 24.5 $\pm$ 1.19ABa | 26.3 $\pm$ 0.79Aa   | 24.4 $\pm$ 1.04ABa | 23.7 $\pm$ 0.74ABb |
|                                                           | 2020 | 28.0 $\pm$ 0.90Aa  | 23.5 $\pm$ 0.81Da   | 24.9 $\pm$ 0.25CDa | 27.5 $\pm$ 0.79ABa  | 23.7 $\pm$ 0.50Da  | 26.2 $\pm$ 0.21BCa |
| pH                                                        | 2018 | 8.21 $\pm$ 0.02Aa  | 8.24 $\pm$ 0.10Aa   | 8.10 $\pm$ 0.24Aa  | 7.70 $\pm$ 0.01Bb   | 7.91 $\pm$ 0.04ABb | 8.02 $\pm$ 0.17ABa |
|                                                           | 2019 | 8.14 $\pm$ 0.06Aa  | 8.12 $\pm$ 0.11Aa   | 8.03 $\pm$ 0.12Aa  | 7.59 $\pm$ 0.02Bc   | 7.97 $\pm$ 0.08Aab | 7.98 $\pm$ 0.10Aa  |
|                                                           | 2020 | 7.96 $\pm$ 0.03Cb  | 8.12 $\pm$ 0.01Ba   | 8.23 $\pm$ 0.03Aa  | 7.79 $\pm$ 0.04Da   | 8.06 $\pm$ 0.02Ba  | 8.21 $\pm$ 0.03Aa  |
| EC<br>(us cm <sup>-1</sup> )                              | 2018 | 185 $\pm$ 4.30Db   | 173 $\pm$ 1.75Db    | 189 $\pm$ 16.2Db   | 346 $\pm$ 31.5Cb    | 541 $\pm$ 19.5Ab   | 440 $\pm$ 22.0Bb   |
|                                                           | 2019 | 230 $\pm$ 6.51Da   | 313 $\pm$ 22.6Ca    | 346 $\pm$ 21.7Ca   | 477 $\pm$ 5.51Ba    | 712 $\pm$ 14.2Aa   | 743 $\pm$ 50.3Aa   |
|                                                           | 2020 | 108 $\pm$ 7.73BCc  | 131 $\pm$ 5.41Bc    | 104 $\pm$ 5.08BCc  | 102 $\pm$ 3.03Cc    | 205 $\pm$ 21.4Ac   | 104 $\pm$ 7.53BCc  |
| SOC<br>(g kg <sup>-1</sup> )                              | 2018 | 17.7 $\pm$ 0.35Cb  | 21.2 $\pm$ 1.07ABab | 22.2 $\pm$ 1.02Aab | 18.7 $\pm$ 0.12BCa  | 20.4 $\pm$ 1.01ABa | 22.5 $\pm$ 1.42Aa  |
|                                                           | 2019 | 16.5 $\pm$ 0.12Dc  | 21.6 $\pm$ 0.22Ba   | 23.2 $\pm$ 0.28Aa  | 18.6 $\pm$ 0.14Ca   | 20.7 $\pm$ 0.18Ba  | 22.8 $\pm$ 0.84Aa  |
|                                                           | 2020 | 18.6 $\pm$ 0.44Ba  | 20.0 $\pm$ 0.20ABb  | 21.2 $\pm$ 0.62Ab  | 18.8 $\pm$ 0.55Ba   | 20.0 $\pm$ 0.78ABa | 21.1 $\pm$ 0.96Aa  |
| TN<br>(g kg <sup>-1</sup> )                               | 2018 | 2.03 $\pm$ 0.08Bb  | 1.92 $\pm$ 0.08Ba   | 1.98 $\pm$ 0.08Ba  | 2.33 $\pm$ 0.04Aa   | 2.15 $\pm$ 0.08ABa | 2.30 $\pm$ 0.16Aa  |
|                                                           | 2019 | 2.21 $\pm$ 0.03Ba  | 1.87 $\pm$ 0.03Ca   | 1.95 $\pm$ 0.04Ca  | 2.30 $\pm$ 0.05ABab | 2.29 $\pm$ 0.03Ba  | 2.41 $\pm$ 0.06Aa  |
|                                                           | 2020 | 2.11 $\pm$ 0.05Bab | 1.80 $\pm$ 0.05Ca   | 1.87 $\pm$ 0.09Ca  | 2.22 $\pm$ 0.03ABb  | 2.20 $\pm$ 0.06ABa | 2.36 $\pm$ 0.09Aa  |
| TP<br>(mg kg <sup>-1</sup> )                              | 2018 | 0.66 $\pm$ 0.03Ca  | 0.78 $\pm$ 0.04Ba   | 0.84 $\pm$ 0.02Aa  | 0.76 $\pm$ 0.01Ba   | 0.76 $\pm$ 0.02Ba  | 0.84 $\pm$ 0.01Aa  |
|                                                           | 2019 | 0.67 $\pm$ 0.03Aa  | 0.68 $\pm$ 0.02Ab   | 0.73 $\pm$ 0.09Aa  | 0.73 $\pm$ 0.07Aa   | 0.73 $\pm$ 0.05Aa  | 0.76 $\pm$ 0.12Aa  |
|                                                           | 2020 | 0.66 $\pm$ 0.13Aa  | 0.67 $\pm$ 0.03Ab   | 0.70 $\pm$ 0.07Aa  | 0.71 $\pm$ 0.06Aa   | 0.70 $\pm$ 0.09Aa  | 0.80 $\pm$ 0.03Aa  |
| NH <sub>4</sub> <sup>+</sup> -N<br>(mg kg <sup>-1</sup> ) | 2018 | 48.7 $\pm$ 1.63Ba  | 52.2 $\pm$ 7.84ABa  | 54.9 $\pm$ 4.68ABa | 61.5 $\pm$ 1.90Aa   | 54.1 $\pm$ 0.82ABa | 48.3 $\pm$ 2.91Ba  |
|                                                           | 2019 | 7.26 $\pm$ 0.78Ab  | 7.57 $\pm$ 1.05Ab   | 7.59 $\pm$ 0.96Ab  | 5.69 $\pm$ 0.31Ab   | 9.07 $\pm$ 3.15Ab  | 19.4 $\pm$ 12.3Ab  |
|                                                           | 2020 | 6.88 $\pm$ 0.90ABb | 7.84 $\pm$ 1.60Ab   | 6.30 $\pm$ 0.93ABb | 5.77 $\pm$ 1.09ABb  | 4.69 $\pm$ 0.67Bb  | 5.37 $\pm$ 0.68ABb |
| NO <sub>3</sub> <sup>-</sup> -N<br>(mg kg <sup>-1</sup> ) | 2018 | 68.8 $\pm$ 7.67Ba  | 40.2 $\pm$ 0.29Ba   | 40.8 $\pm$ 2.00Ba  | 376 $\pm$ 55.6Aa    | 433 $\pm$ 17.5Aa   | 413 $\pm$ 38.2Ab   |
|                                                           | 2019 | 7.38 $\pm$ 0.47Db  | 17.0 $\pm$ 4.19Db   | 13.3 $\pm$ 1.27Db  | 73.0 $\pm$ 5.12Cb   | 276 $\pm$ 12.5Bb   | 488 $\pm$ 30.1Aa   |
|                                                           | 2020 | 16.5 $\pm$ 3.99Cb  | 14.4 $\pm$ 2.41Cb   | 7.83 $\pm$ 0.38Cc  | 18.3 $\pm$ 2.81Cb   | 106 $\pm$ 1.38Ac   | 34.6 $\pm$ 10.9Bc  |
| Available P                                               | 2018 | 112 $\pm$ 1.22Ba   | 127 $\pm$ 2.97Aa    | 122 $\pm$ 6.10ABa  | 117 $\pm$ 2.08ABb   | 118 $\pm$ 7.26ABa  | 117 $\pm$ 1.37ABa  |

|                        |      |                |                 |                |                |                |                |
|------------------------|------|----------------|-----------------|----------------|----------------|----------------|----------------|
| (mg kg <sup>-1</sup> ) | 2019 | 96.2 ± 28.16Ba | 141 ± 19.2Aa    | 92.0 ± 10.2Bb  | 123 ± 3.21ABa  | 126 ± 13.7ABa  | 96.7 ± 10.1ABb |
|                        | 2020 | 87.4 ± 2.97Aa  | 86.5 ± 2.32Ab   | 56.8 ± 0.87BCc | 52.4 ± 0.56Cc  | 59.9 ± 3.65Bb  | 50.3 ± 2.69Cc  |
| Available K            | 2018 | 330 ± 25.5Ca   | 353 ± 6.60BCa   | 231 ± 8.37Eb   | 443 ± 5.87Aa   | 273 ± 2.80Da   | 374 ± 8.98Ba   |
| (mg kg <sup>-1</sup> ) | 2019 | 293 ± 4.75Ca   | 333 ± 10.0Bb    | 253 ± 11.5Db   | 358 ± 1.54Ab   | 290 ± 8.17Ca   | 348 ± 7.39ABb  |
|                        | 2020 | 322 ± 13.2BCa  | 364 ± 3.50Aa    | 284 ± 7.19Ca   | 357 ± 8.24ABb  | 309 ± 29.3Ca   | 303 ± 8.82Cc   |
| DOC                    | 2018 | 146 ± 1.61Ab   | 177 ± 25.0Ab    | 163 ± 9.25Ab   | 144 ± 2.75Ab   | 184 ± 39.1Aa   | 148 ± 3.14Ab   |
| (mg kg <sup>-1</sup> ) | 2019 | 201 ± 4.97Ba   | 220 ± 4.75Aa    | 188 ± 1.40Ca   | 160 ± 6.21Dab  | 161 ± 2.57Da   | 134 ± 2.15Eb   |
|                        | 2020 | 161 ± 13.6ABb  | 178 ± 1.51Ab    | 188 ± 1.66Aa   | 184 ± 19.8Aa   | 138 ± 3.24Ba   | 174 ± 14.1Aa   |
| DON                    | 2018 | 81.5 ± 1.34Ca  | 60.4 ± 6.96Ca   | 63.4 ± 2.26Ca  | 335 ± 36.1Aa   | 325 ± 17.7ABa  | 285 ± 8.75Ba   |
| (mg kg <sup>-1</sup> ) | 2019 | 43.0 ± 0.23Bb  | 43.8 ± 2.45Bb   | 41.2 ± 0.74Bb  | 265 ± 1.08Ab   | 279 ± 2.29Ab   | 259 ± 35.5Aa   |
|                        | 2020 | 37.3 ± 2.23Cc  | 40.4 ± 3.36BCb  | 41.8 ± 0.88BCb | 45.3 ± 6.26BCc | 105 ± 14.1Ac   | 57.5 ± 1.40Bb  |
| MBC                    | 2018 | 216 ± 8.94Ab   | 206 ± 59.9Ab    | 236 ± 10.9Ab   | 198 ± 9.70Aa   | 191 ± 13.2Aa   | 224 ± 22.1Ab   |
| (mg kg <sup>-1</sup> ) | 2019 | 167 ± 25.1BCa  | 216 ± 7.24ABCab | 228 ± 34.8Ab   | 161 ± 12.2Cb   | 176 ± 22.1ABCa | 220 ± 14.8ABb  |
|                        | 2020 | 265 ± 15.3Ba   | 301 ± 6.41Ba    | 297 ± 16.7Ba   | 217 ± 8.65Ca   | 217 ± 22.1Ca   | 342 ± 13.7Aa   |
| MBN                    | 2018 | 32.1 ± 3.72Ca  | 43.6 ± 5.00BCa  | 43.6 ± 2.15BCa | 52.1 ± 3.72ABa | 66.3 ± 7.37Aa  | 51.2 ± 7.31Ba  |
| (mg kg <sup>-1</sup> ) | 2019 | 28.7 ± 4.67Ca  | 29.7 ± 6.25BCa  | 20.13 ± 4.91Cb | 43.2 ± 3.93ABa | 50.6 ± 6.14Aab | 55.5 ± 4.22Aa  |
|                        | 2020 | 23.3 ± 5.17Aa  | 24.7 ± 12.2Aa   | 28.6 ± 10.4Aab | 43.0 ± 7.64Aa  | 35.7 ± 14.9Ab  | 39.9 ± 17.2Aa  |

Note: N0 or N1 refers to N fertilizer application rates of 0 or 240 kg N ha<sup>-1</sup>, respectively. C0, C1 and C2 refer to biochar incorporation rates of 0, 20 and 40 t ha<sup>-1</sup>, respectively. CEC: cation exchange capacity; EC: electrical conductivity; SOC: soil organic carbon; TN: total N; TP: total P; DOC: dissolved soil organic carbon; DON: dissolved soil organic nitrogen; MBC: microbial biomass carbon; MBN: microbial biomass nitrogen. Capital letters indicate significant differences among treatments for each cropping year at  $p < 0.05$ . Lowercase letters indicate significant differences among cropping years for each treatment at  $p < 0.05$ .

Table S6 Results of two-way ANOVA (F-values and significance) for soil properties. \*\*\* Significant at  $p < 0.001$ ; \*\* Significant at  $p < 0.01$ ; \* Significant at  $p < 0.05$ .

| Parameter                       | Year | N        | Biochar  | N × Biochar |
|---------------------------------|------|----------|----------|-------------|
| CEC                             | 2018 | 0.586    | 33.77*** | 1.583       |
|                                 | 2019 | 0.332    | 11.54**  | 2.327       |
|                                 | 2020 | 1.410    | 62.27*** | 2.722       |
| pH                              | 2018 | 25.64*** | 1.553    | 4.162*      |
|                                 | 2019 | 34.65*** | 6.776*   | 12.74**     |
|                                 | 2020 | 42.49*** | 270.7*** | 13.67**     |
| EC                              | 2018 | 850.6*** | 35.56*** | 44.94***    |
|                                 | 2019 | 861.5*** | 99.12*** | 18.06***    |
|                                 | 2020 | 21.94**  | 75.26*** | 27.62***    |
| SOC                             | 2018 | 0.109    | 30.31*** | 1.446       |
|                                 | 2019 | 1.492    | 308.6*** | 26.84***    |
|                                 | 2020 | 0.002    | 22.81*** | 0.118       |
| TN                              | 2018 | 43.20*** | 3.937*   | 0.373       |
|                                 | 2019 | 279.4*** | 28.16*** | 37.69***    |
|                                 | 2020 | 109.0*** | 8.655**  | 12.89**     |
| TP                              | 2018 | 5.434*   | 46.61*** | 9.538**     |
|                                 | 2019 | 1.643    | 0.730    | 0.052       |
|                                 | 2020 | 2.756    | 1.330    | 0.394       |
| NH <sub>4</sub> <sup>+</sup> -N | 2018 | 1.979    | 1.129    | 8.742**     |
|                                 | 2019 | 2.525    | 2.910    | 2.698       |
|                                 | 2020 | 12.75**  | 0.400    | 2.168       |
| NO <sub>3</sub> <sup>-</sup> -N | 2018 | 701.6*** | 0.381    | 3.650       |
|                                 | 2019 | 1730***  | 360.1*** | 340.6***    |
|                                 | 2020 | 288.7*** | 134.6*** | 128.7***    |
| Available P                     | 2018 | 2.027    | 5.532*   | 3.977*      |
|                                 | 2019 | 0.541    | 8.943**  | 2.438       |
|                                 | 2020 | 388.1*** | 110.8*** | 53.47***    |
| Available K                     | 2018 | 103.9*** | 85.31*** | 148.9***    |
|                                 | 2019 | 107.1*** | 15.30*** | 126.4***    |
|                                 | 2020 | 0.005    | 19.14*** | 16.64***    |
| DOC                             | 2018 | 0.142    | 5.435*   | 0.499       |
|                                 | 2019 | 718.6*** | 79.49*** | 7.335**     |
|                                 | 2020 | 3.613    | 6.416*   | 11.28**     |
| DON                             | 2018 | 938.0*** | 6.012*   | 2.638       |
|                                 | 2019 | 1075***  | 0.887    | 0.550       |
|                                 | 2020 | 90.74*** | 36.76*** | 32.71***    |
| MBC                             | 2018 | 1.355    | 2.075    | 0.017       |
|                                 | 2019 | 3.168    | 11.72**  | 1.180       |
|                                 | 2020 | 16.83**  | 46.40*** | 30.37***    |
| MBN                             | 2018 | 45.91*** | 9.094**  | 3.555       |
|                                 | 2019 | 96.20*** | 1.029    | 6.656*      |
|                                 | 2020 | 6.128*   | 0.182    | 0.252       |

Note: CEC: cation exchange capacity; EC: electrical conductivity; SOC: soil organic carbon; TN: total N; TP: total P; DOC: dissolved soil organic carbon; DON: dissolved soil organic nitrogen; MBC: microbial biomass carbon; MBN: microbial biomass nitrogen.

Table S7 Pearson correlation coefficients among selected soil indicators. \*\*

Significant at  $p < 0.01$ ; \* Significant at  $p < 0.05$ .

|                                 | PH       | TP     | NO <sub>3</sub> <sup>-</sup> -N | Available K | DOC      | DON   |
|---------------------------------|----------|--------|---------------------------------|-------------|----------|-------|
| PH                              | 1.000    |        |                                 |             |          |       |
| TP                              | -0.011   | 1.000  |                                 |             |          |       |
| NO <sub>3</sub> <sup>-</sup> -N | -0.341*  | 0.327* | 1.000                           |             |          |       |
| Available K                     | -0.387** | -0.043 | 0.298*                          | 1.000       |          |       |
| DOC                             | 0.240    | -0.256 | -0.473**                        | -0.286*     | 1.000    |       |
| DON                             | -0.570** | 0.299* | 0.888**                         | 0.349**     | -0.434** | 1.000 |

Note: TP: total P; DOC: dissolved soil organic carbon; DON: dissolved soil organic nitrogen.

## References

69. Lu, R., 1999. Analytical methods for soils and agricultural chemistry. China Agricultural Science and Technology Press of China, Beijing.
70. Shen, H., Zhang, Q., Zhang, X., Jiang, X., Zhu, S., Chen, A., Wu, Z., Xiong, Z., 2021. In situ effects of biochar field-aged for six years on net N mineralization in paddy soil. Soil Till. Res. 205, 104766.
